# Supplementary material for: Ecological Assessment of Terminal Lake Basins in Central Asia under Changing Landscape Patterns
Source: MDPI journal article supplement (doi:10.3390/rs14194842), 2022-09-28
Supplement: s1 [file s1]

## Supplementary materials

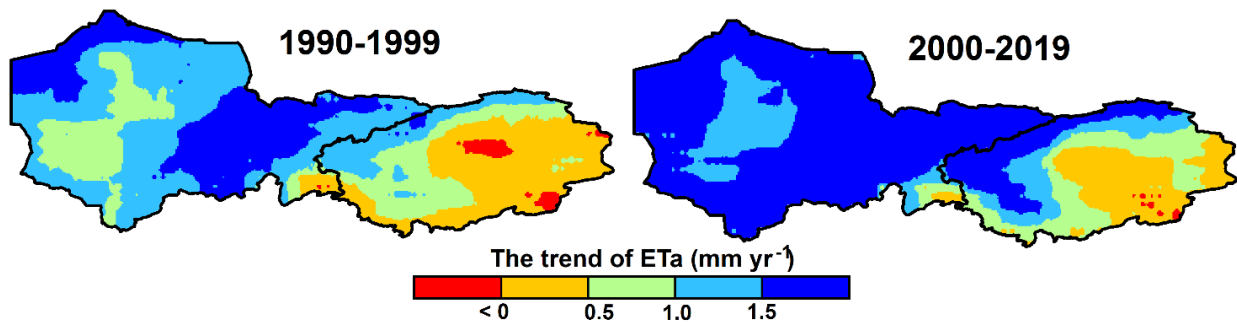

**Figure S1.** Spatial variation in actual evaporation (ETa) in the Aral Sea Basin and the Tarim River Basin, Central Asia, before and after ecological water conveyance.

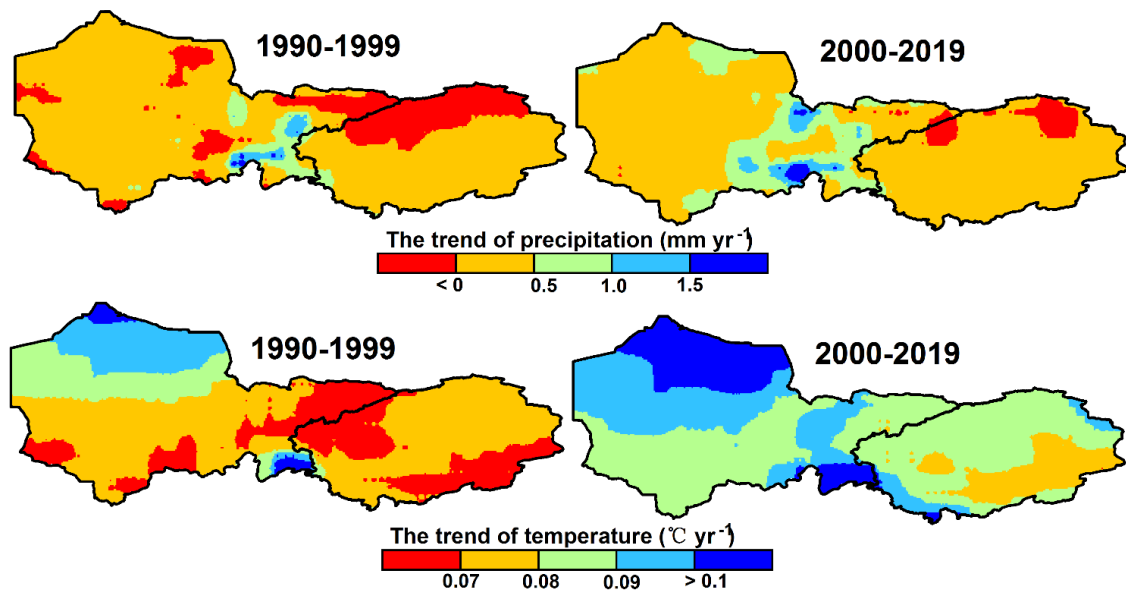

**Figure S2.** Spatial variation in precipitation and temperature in the Aral Sea Basin and the Tarim River Basin, Central Asia, before and after ecological water conveyance.
